# Supplementary material
Source: PubMed Central journal article supplement (PMC7456660)
Supplement: 10096_2020_4024_MOESM1_ESM.pdf [file 10096_2020_4024_MOESM1_ESM.pdf]

**SUPPLEMENTAL MATERIAL**

Supplemental Table 1

Supplemental Table 1. Changes of RT-PCR test results in discharged COVID-19 patients

| Case   | Samples | RT-PCR-1 | Test days after discharge | RT-PCR-2 | Test days after discharge | RT-PCR-3 | Test days after discharge | RT-PCR-4 | Test days after discharge | RT-PCR-5 | Test days after discharge | RT-PCR-6 | Test days after discharge | RT-PCR-7 | Test days after discharge |
|--------|---------|----------|---------------------------|----------|---------------------------|----------|---------------------------|----------|---------------------------|----------|---------------------------|----------|---------------------------|----------|---------------------------|
| Case1  | Naso    | P        | 11                        | P        | 13                        | N        | 19                        | N        | 20                        | N        | 26                        | NA       | NA                        | NA       | NA                        |
| Case 2 | Naso    | P        | 14                        | P        | 15                        | N        | 21                        | N        | 22                        | N        | 25                        | N        | 28                        | NA       | NA                        |
| Case 3 | Oro     | W        | 20                        | W        | 21                        | N        | 23                        | N        | 25                        | N        | 29                        | N        | 33                        | N        | 35                        |

Abbreviations: P indicates positive; W indicates weakly positive; N indicates negative; NA: Not applicable; RT-PCR: real-time reverse transcription polymerase chain reaction; Naso: nasopharyngeal swab; Oro: oropharyngeal swabs;
